# Supplementary material for: Population genomics of Bronze Age Eurasia
Source: Springer Nature journal article supplement (doi:10.1038/nature14507), 2015-06-09
Supplement: 41586_2015_BFnature14507_MOESM139_ESM.xlsx [file 41586_2015_BFnature14507_MOESM139_ESM.xlsx]

## Sheet: Sample
Supplementary Table 6: Sequencing statistics
Shotgun sequencing of 103 ancient human samples (102 individuals). Total is the total number of DNA reads per library.
Trimmed, is number sequences passing quality and length filtering. Unique is the number of sequences mapping uniquely to the human reference genome,
and Rmdup is the same number but with all duplicate sequences removed. Endo % is the proportion of sequences after trimming that could be identified as human,
and Clon % is the proportion of identical reads (clones) in this human DNA fraction. Efficiency % is the overall sequencing efficiency (Rmdup/Total).
DoC: Average genomic depth of coverage. * Same individual
Sample	Total	Trimmed	Unique	Rmdup	Endo %	Clonality %	Efficiency %	DoC
RISE00	1310410054	924270100	95256127	43325406	7.26918	54.5169	3.30625	0.755
RISE1	712956292	598472074	8265159	522795	1.15928	93.6747	0.0733278	0.013
RISE21	1336592604	1310961064	12742814	771976	0.953381	93.9419	0.057757	0.021
RISE42	431172543	285059735	7068766	607185	1.63943	91.4103	0.140822	0.014
RISE47	1021451046	964918333	16518532	6716028	1.61716	59.3425	0.657499	0.108
RISE61	2043788068	1468735338	60222912	18663402	2.94663	69.0095	0.913177	0.314
RISE71	681755716	671642994	63368506	15139661	9.2949	76.1085	2.22069	0.275
RISE94	570308879	456722822	50644171	45094607	8.88013	10.958	7.90705	0.744
RISE97	642117744	530532520	33655647	29932922	5.24135	11.0612	4.66159	0.611
RISE98	721233705	676715983	299474960	238930766	41.5226	20.2168	33.1281	4.973
RISE109	1205853720	1180915067	16564078	7728590	1.37364	53.3413	0.640923	0.191
RISE139	487240605	449351390	8673639	980795	1.78016	88.6922	0.201296	0.021
RISE145	752263017	645361648	14467770	1110844	1.92323	92.3219	0.147667	0.023
RISE150	1067864400	1045494257	351044519	128978509	32.8735	63.2586	12.0782	2.625
RISE154	446520735	375534256	15773593	9672526	3.53256	38.679	2.1662	0.151
RISE174	903444297	881921307	143174928	125601188	15.8477	12.2743	13.9025	2.487
RISE175	686499410	666865507	7138976	4160159	1.03991	41.7261	0.605996	0.091
RISE179	2041861452	1950748594	53649693	2371124	2.62749	95.5804	0.116126	0.044
RISE207	105675263	100237412	1133672	955967	1.07279	15.6752	0.904627	0.016
RISE210	368453709	337502812	12184075	3090457	3.30681	74.6353	0.838764	0.058
RISE240	782494191	767592187	11393771	5979839	1.45608	47.5166	0.764202	0.169
RISE247	777566318	761128386	16137575	11434901	2.0754	29.1411	1.4706	0.246
RISE254	270729876	268286632	24426780	2827410	9.02257	88.425	1.04437	0.064
RISE276	612711101	555113206	12107456	3413262	1.97605	71.8086	0.557075	0.072
RISE349	1224821799	1023885553	18943178	4975726	1.54661	73.7334	0.406241	0.083
RISE371	498895760	458027507	4216883	2619704	0.845243	37.8758	0.5251	0.052
RISE373	1383712744	1297097325	54225826	11453385	3.91886	78.8784	0.827729	0.275
RISE374	688879923	645760768	25700171	7246385	3.73072	71.8041	1.05191	0.167
RISE386	821884944	703569497	47973394	37880645	5.837	21.0382	4.609	0.636
RISE391	461399830	445785730	18511625	2957344	4.01206	84.0244	0.64095	0.063
RISE392	480780079	424657845	61124739	30585489	12.7137	49.9622	6.36164	0.645
RISE394	2094647122	1874231220	49077040	25892548	2.34297	47.241	1.23613	0.384
RISE395	1526286147	1424023940	289708606	144531661	18.9813	50.1114	9.4695	2.317
RISE396	701887646	615985273	13281495	2212069	1.89225	83.3447	0.31516	0.048
RISE397	819989865	794202946	24331295	9544731	2.96727	60.7718	1.16401	0.197
RISE407	222223124	205278795	25182184	22588177	11.3319	65.0223	10.1646	0.261
RISE408	399166374	352934109	17573663	3992174	4.40259	77.2832	1.00013	0.095
RISE412	620675356	584933713	9873225	5603649	1.59072	43.244	0.902831	0.088
RISE413	1191814798	1039965040	17358915	1562427	1.45651	90.9993	0.131096	0.029
RISE416	1442086778	1334926864	26225988	988348	1.81861	96.2314	0.068536	0.021
RISE423	1984500923	1771979354	186367492	27896796	9.39115	85.0313	1.40573	0.555
RISE431	619294258	554850027	24689734	6609101	3.98675	73.2314	1.0672	0.107
RISE434	684965662	610009700	6500051	5303062	0.94896	18.4151	0.774208	0.086
RISE435	862379978	733700084	11356020	3309609	1.31682	70.8559	0.383776	0.053
RISE436	147053645	137422345	6193821	2766405	4.21195	55.3361	1.88122	0.068
RISE446	797562673	764369858	12486995	6457361	1.56564	48.2873	0.809637	0.161
RISE471	1074201899	989579375	13527276	4620348	1.25929	65.8442	0.430119	0.093
RISE479	1242647684	1146766804	112819371	54518098	9.07895	51.6767	4.38725	1.151
RISE480	259276748	198595456	8666219	6900998	3.34246	20.369	2.66163	0.114
RISE483	951271751	877859878	8598243	5073401	0.903868	40.9949	0.533328	0.099
RISE484	541606675	425720083	10540892	7025772	1.94623	33.3475	1.29721	0.12
RISE486	4150494725	2340522625	78394151	15453227	1.88879	80.2878	0.372323	0.245
RISE487	3530884048	2160960294	22236819	16431652	0.62978	26.1061	0.465369	0.211
RISE489	2837694002	2199522451	36336312	30065071	1.28049	17.2589	1.05949	0.486
RISE492	1007986127	618841189	7686880	7167397	0.762598	6.75805	0.711061	0.112
RISE493	1316643610	1020997962	529112809	466018086	40.1865	11.9246	35.3944	6.414
RISE494	2860184689	1132055936	20846723	17312797	0.728859	16.9519	0.605303	0.218
RISE495	1570859369	1025791775	260269663	214593365	16.5686	17.5496	13.6609	3.54
RISE496	2330193891	1323214858	216074330	194824730	9.2728	9.83439	8.36088	2.424
RISE497	1893915397	1339984798	645385049	487400221	34.0768	24.4792	25.7351	7.406
RISE499	1289111873	852891062	100936724	96210483	7.82994	4.68238	7.46332	1.266
RISE500	488706687	233981973	121970277	116063035	24.9578	4.84318	23.749	1.402
RISE502	700032110	440413817	86688433	81234523	12.3835	6.29139	11.6044	1.139
RISE503	579756874	275652413	55758132	51834469	9.6175	7.03693	8.94073	0.706
RISE504	657668584	397370116	98270550	92512210	14.9423	5.85968	14.0667	1.259
RISE505	808024633	570305734	331339800	309500235	41.0062	6.59129	38.3033	4.422
RISE507*	638734607	205641971	10487671	9442088	1.64195	9.96964	1.47825	0.127
RISE508*	808038622	283639858	26408071	21207252	3.26817	19.6941	2.62453	0.259
RISE509	435889160	253707061	59828066	54818015	13.7255	8.37408	12.5761	0.773
RISE510	649112511	163508882	16562314	14029278	2.55153	15.294	2.1613	0.198
RISE511	923169215	596085047	283292858	196685778	30.687	30.5716	21.3055	2.941
RISE512	1908005544	833186071	19441215	17958812	1.01893	7.62505	0.941235	0.235
RISE515	1503924994	1191170516	158407956	8690367	10.533	94.5139	0.577846	0.182
RISE516	1128829656	870658769	74575452	16602427	6.60644	77.7374	1.47076	0.338
RISE523	846636327	496553514	172674038	164372619	20.3953	4.80757	19.4148	2.194
RISE524	1194513470	777687353	4524120	2161438	0.378742	52.2241	0.180947	0.032
RISE525	1451760998	720527831	18682824	14473745	1.28691	22.5291	0.996978	0.189
RISE546	251687719	221102467	8123718	5735230	3.2277	29.4014	2.27871	0.12
RISE547	375381413	360578942	59463930	23224716	15.8409	60.9432	6.18696	0.658
RISE548	875037237	758324990	53999488	45162951	6.17111	16.3641	5.16126	0.87
RISE550	620540079	481732613	31048520	21111261	5.00347	32.0056	3.40208	0.421
RISE552	946405884	687820896	209886219	149501729	22.1772	28.7701	15.7968	2.343
RISE553	73580426	69139809	7717502	3087406	10.4885	59.9947	4.19596	0.065
RISE554	84394836	78973883	12229208	8447316	14.4905	30.9251	10.0093	0.172
RISE555	149000184	124977088	42795695	11130506	28.7219	73.9915	7.47013	0.226
RISE559	417583481	215343303	8420687	7336627	2.01653	12.8738	1.75692	0.108
RISE560	265246737	126607102	2843850	2627565	1.07215	7.60536	0.990612	0.043
RISE562	296240083	147228760	24844112	3360194	8.38648	86.4749	1.13428	0.048
RISE563	205211499	155584154	36628412	16802403	17.8491	54.1274	8.18785	0.283
RISE564	394920014	315999091	10313022	3584903	2.61142	65.2391	0.907754	0.07
RISE566	241913170	113976860	9276679	5077956	3.83471	45.2611	2.09908	0.091
RISE567	268178950	194012802	1392752	1334308	0.519337	4.1963	0.497544	0.024
RISE568	424723998	228512725	2589096	2400695	0.609595	7.27671	0.565236	0.048
RISE569	215938887	158418355	60926618	53122754	28.2148	12.8086	24.6008	0.805
RISE577	283490693	219815699	57410388	54241888	20.2512	5.51904	19.1336	0.839
RISE586	321126820	221261362	12431065	10905207	3.87108	12.2746	3.39592	0.148
RISE595	238552649	141165533	1392031	1101534	0.583532	20.8686	0.461757	0.02
RISE596	259647767	195949214	800194	705587	0.308184	11.823	0.271748	0.011
RISE598	324027073	70262318	9592935	1071150	2.96054	88.834	0.330574	0.013
RISE600	64072860	62383881	31674243	30184213	49.4347	4.70423	47.1092	0.664
RISE601	107530764	104038218	50398971	48550839	46.8694	3.667	45.1507	1.056
RISE602	99060558	96946000	55589167	54372767	56.1163	2.1882	54.8884	1.15
